# Supplementary material for: Nanopore-based detection and characterization of yam viruses
Source: PubMed Central journal article supplement (PMC6294787; doi:10.1038/s41598-018-36042-7), 2018-12-14

## Nanopore-based detection and characterization of yam viruses

Denis Filloux, Emmanuel Fernandez, Etienne Loire, Lisa Claude, Serge Galzi, Thierry Candresse, Stephan Winter, M. L. Jeeva, T. Makesh Kumar, Darren P. Martin, and Philippe Roumagnac

**Supplementary Table 1. Primers used for sequencing (Sanger) yam chlorotic necrosis virus complete genome**

| Primers code | Primers     | Sequences                 | Positions              | Authors                                   |
|--------------|-------------|---------------------------|------------------------|-------------------------------------------|
| P1           | ANCHOR-DT-V | CACGCGTATCGATGTCGAC(T)16V | 3' and A-tailed-5' end | Roche <sup>(C)</sup>                      |
| P2           | ANCHOR      | CACGCGTATCGATGTCGAC       | 3' and A-tailed-5' end | Roche <sup>(C)</sup>                      |
| P3           | M4T         | GTTTTCCCAGTCACGAC(T)15    | 3' and A-tailed-5' end | Chen <i>et al.</i> , 2001 <sup>1</sup>    |
| P4           | M4          | GTTTTCCCAGTCACGAC         | 3' and A-tailed-5' end | Chen <i>et al.</i> , 2001 <sup>1</sup>    |
| P5           | poly-C      | ATCCTGCAGGCGCG(C)16       | G-tailed-5' end        | Knierim <i>et al.</i> , 2015 <sup>2</sup> |
| P6           | poly-C-D    | ATCCTGCAGGCGCG(C)16D      | G-tailed-5' end        | Palanga <i>et al.</i> , 2017 <sup>3</sup> |
| P7           | poly-G      | CTCAAACAGTCAC(G)15        | C-tailed-5' end        | Knierim <i>et al.</i> , 2015 <sup>2</sup> |
| P8           | poly-G-H    | CTCAAACAGTCAC(G)15H       | C-tailed-5' end        | Palanga <i>et al.</i> , 2017 <sup>3</sup> |

|     |               |                          |      |            |
|-----|---------------|--------------------------|------|------------|
| P9  | YamMac54F     | AAAATTAACAATTGAATGCAACTA | 1    | This study |
| P10 | YamMac30R     | GTGTCTTACCGATTTTTGCGA    | 126  | This study |
| P11 | YamMac21F     | ACTGSAACTCATGGCAACTG     | 137  | This study |
| P12 | YamMac22R     | ACAGTTGCCATGAGTTSCAG     | 157  | This study |
| P13 | YamMac31R     | GTTTTATCAGGAATTGTCAATG   | 256  | This study |
| P14 | YamMac32F     | CGATGTAATGAGAGAACTTGG    | 671  | This study |
| P15 | YamMac23F     | CACATCTGTGATCAGAGAGG     | 810  | This study |
| P16 | YamMac23R     | CCTCTCTGATCACAGATGTG     | 829  | This study |
| P17 | YamMac33R     | AGCTTCCCTTAATAAGACCTG    | 906  | This study |
| P18 | YamMac34F     | GTGAAAAGAAGATGATGTCTGC   | 1870 | This study |
| P19 | YamMaclura18F | TGCGATGGCAATGATAACGC     | 1889 | This study |
| P20 | YamMaclura17R | ACCACTCCTGATGTTGTGTC     | 2014 | This study |
| P21 | YamMac35R     | TATCCTGTCCAACCTGAATAGC   | 2259 | This study |
| P22 | YamMaclura15F | GAAAGAARGAATGYGATCGAG    | 2836 | This study |
| P23 | YamMaclura14R | GGTGTGTTSGTGAATCCGAA     | 3055 | This study |
| P24 | YamMaclura12F | ATGTGGGATGATGAWGAYGG     | 4176 | This study |
| P25 | YamMaclura11R | CATCATYGGRTTCTTCTGTC     | 4298 | This study |
| P26 | YamMac24R     | GCAGTTTTTCATGGATCAYAAC   | 4502 | This study |
| P27 | YamMaclura10F | GTGATGGTATGATYGTGCAGA    | 5089 | This study |
| P28 | YamMaclura9R  | GTTGGWATYTGATGAGCCCA     | 5206 | This study |

|     |               |                       |      |                           |
|-----|---------------|-----------------------|------|---------------------------|
| P29 | YamMac36F     | TTAAGAGAGCAGGAATGACTG | 5863 | This study                |
| P30 | YamMaclura7AR | CTTCTTCATGGCATAATTGG  | 5966 | This study                |
| P31 | YamMac37F     | CAGCAAAACACTTCGTTGATG | 6157 | This study                |
| P32 | YamMac38R     | CCACTACCGTGTAGCCATC   | 6304 | This study                |
| P33 | Sprimer       | GGNAAYAAYAGYGGNCARCC  | 6489 | Chen <i>et al.</i> , 2001 |
| P34 | YamMac39R     | ATAGACCAATTCCAGTTCACC | 6719 | This study                |
| P35 | YAMMAC1F      | ATYGARTGGMGRATHCCWGC  | 7335 | This study                |
| P36 | YAMMAC2R      | CCRTTYGCRYGDAYTTCCAT  | 7639 | This study                |
| P37 | YAMMAC4F      | CHGCAGCWATYGGKMG TG   | 7885 | This study                |
| P38 | YAMMAC3R      | ACKMCCRATWGCTGCDGC    | 7901 | This study                |
| P39 | YAMMAC5R      | GGGTTGCTGAGCR TYGGA   | 8178 | This study                |

**Legend:** Summary of the different primers combinations

**YCNV internal region sequencing**

- **PCR:** P9/P10, P9/P12, P9/P13, P11/P16, P11/P20, P14/P17, P15/P20, P18/P21, P19/P23, P19/P25, P22/P25, P24/P26, P24/P28, P27/P30, P29/P32, P29/P34, P31/P32, P31/P34, P33/P36, P33/P38, P33/P39, P35/P39.

**YCNV 5' region sequencing**

- **5'RACE-PCR:** P13 in RT, then P1/P12, P3/P12, P5/P12, P6/P12, P7/P12, P8/P12 in PCR followed by P2/P10, P4/P10, P5/P10, P6/P10, P8/P10 in nested-PCR.

**YCNV 3' region sequencing**

- **3'RACE-PCR:** P37/P3-P4 in RT-PCR.

**References**

- 1 Chen, J., Chen, J. & Adams, M. J. A universal PCR primer to detect members of the Potyviridae and its use to examine the taxonomic status of several members of the family. *Arch. Virol.* **146**, 757-766, doi:DOI 10.1007/s007050170144 (2001).
- 2 Knierim, D., Maiss, E., Menzel, W., Winter, S. & Kenyon, L. Characterization of the complete genome of a novel Polerovirus infecting *Sauropus androgynus* in Thailand. *Journal of Phytopathology* **163**, 695-702, doi:10.1111/jph.12365 (2015).
- 3 Palanga, E. *et al.* Complete genome sequences of cowpea polerovirus 1 and cowpea polerovirus 2 infecting cowpea plants in Burkina Faso. *Arch Virol* **162**, 2149-2152, doi:10.1007/s00705-017-3327-z (2017).

**Supplementary Figure 1.** Protocol of cDNA production using RT-PCR and the strand-switching method and amplification by PCR using primers supplied in the SQK-PCS108 PCR-cDNA kit from Oxford Nanopore.

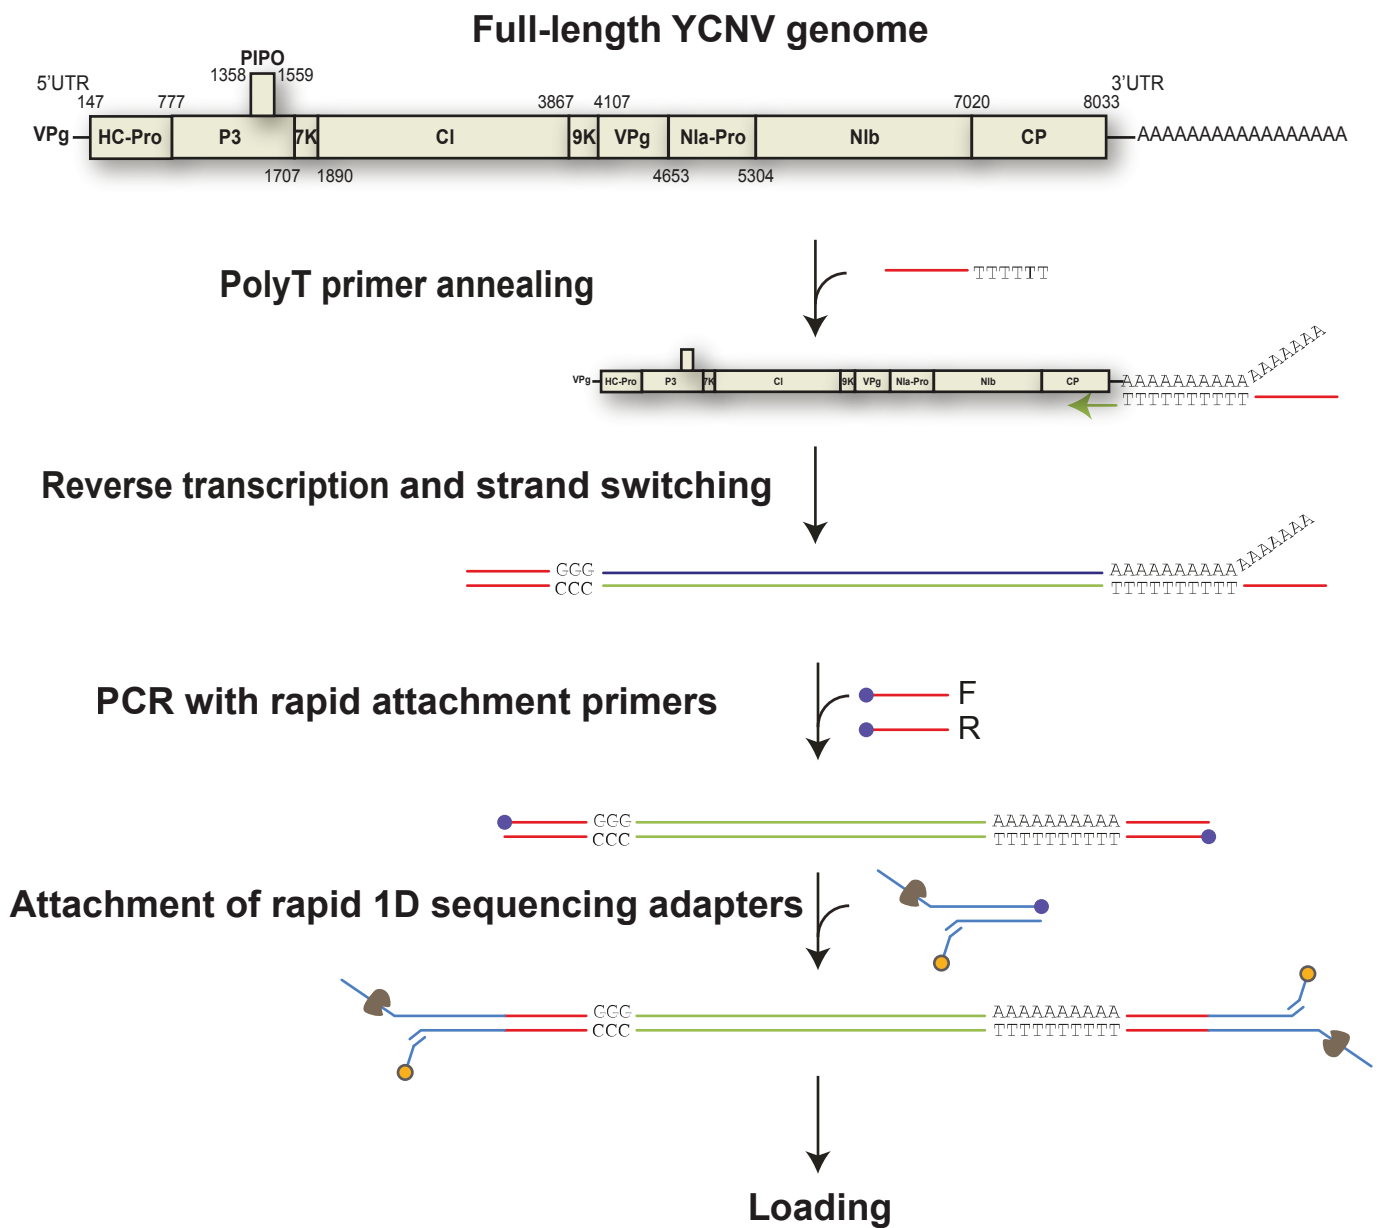

Supplement: 41598_2018_36042_MOESM1_ESM.pdf [file 41598_2018_36042_MOESM1_ESM.pdf]
